# Supplementary material
Source: PubMed Central journal article supplement (PMC4422765)
Supplement: NIHMS667541-supplement-Supplement_desciption.pdf [file NIHMS667541-supplement-Supplement_desciption.pdf]

**Supplementary Figure 1.** Distribution of social jetlag.

Frequency distribution of social jetlag (hours) in the non-shift workers of the Dunedin Longitudinal Study (n=815). The mean social jetlag among participants was 0.88 hours with a standard deviation of 0.96.
